# Supplementary material for: Kinetic and mechanistic investigation of the substitution reactions of four and five co-ordinated rhodium stibine complexes with a bulky phosphite
Source: Royal Society of Chemistry journal article supplement (doi:10.1039/c3dt51757h), 2013-01-01
Supplement: c3dt51757h.pdf [file c3dt51757h.pdf]

*Electronic Supporting Information for*

**Kinetic and mechanistic investigation of the substitution reactions of four and five co-ordinated rhodium stibine complexes with bulky phosphites**

Clare Hennion <sup>a</sup>, Klara Jonasson <sup>b</sup>, Ola F. Wendt<sup>b\*</sup> and Andreas Roodt<sup>a\*</sup>

<sup>a</sup> *Department of Chemistry, University of the Free State, P.O. Box 339, Bloemfontein, 9300, South Africa. E-mail: roodta@ufs.ac.za; Fax: +27 51 4446384; Tel: +27 51 4012547*

<sup>b</sup> *Centre for Analysis and Synthesis, Department of Chemistry, Lund University, P.O. Box 124, S-22100 Lund, Sweden. E-mail: ola.wendt@organic.lu.se*

**Contents**

|            |       |
|------------|-------|
| 1. Figures | S2-S4 |
| 2. Tables  | S5-S7 |

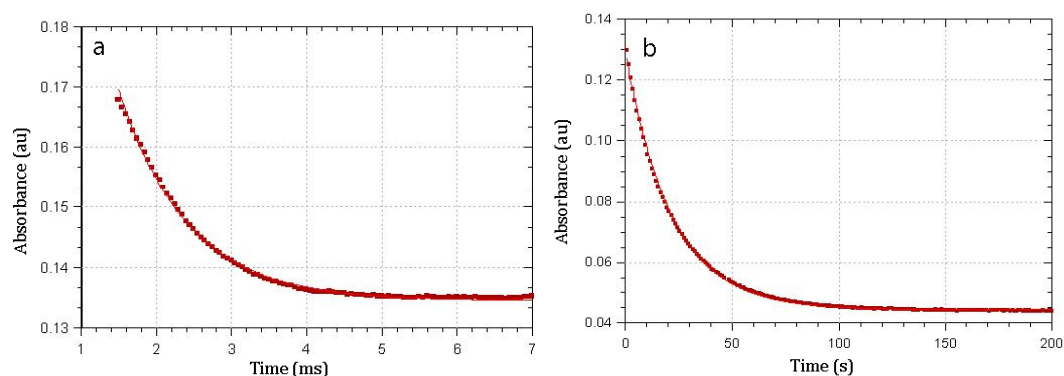

**Figure S1.** Absorbance change at 310 nm in  $\text{CH}_2\text{Cl}_2$  at  $T = 25^\circ\text{C}$  for (a) the addition of 2,4-TBPP to  $\text{trans-}[\text{Rh}(\text{Cl})(\text{CO})(\text{SbPh}_3)_2]$  to form  $\text{trans-}[\text{Rh}(\text{Cl})(\text{CO})(\text{SbPh}_3)(2,4\text{-TBPP})]$  and (b) the addition of 2,4-TBPP to  $\text{trans-}[\text{Rh}(\text{Cl})(\text{CO})(\text{SbPh}_3)(2,4\text{-TBPP})]$  to form  $\text{trans-}[\text{Rh}(\text{Cl})(\text{CO})(2,4\text{-TBPP})_2]$ .  $[\text{Rh}] = 0.25\text{ mM}$ ,  $[2,4\text{-TBPP}] = 2.5\text{ mM}$ . The solid line denotes the best fit to a single exponential.

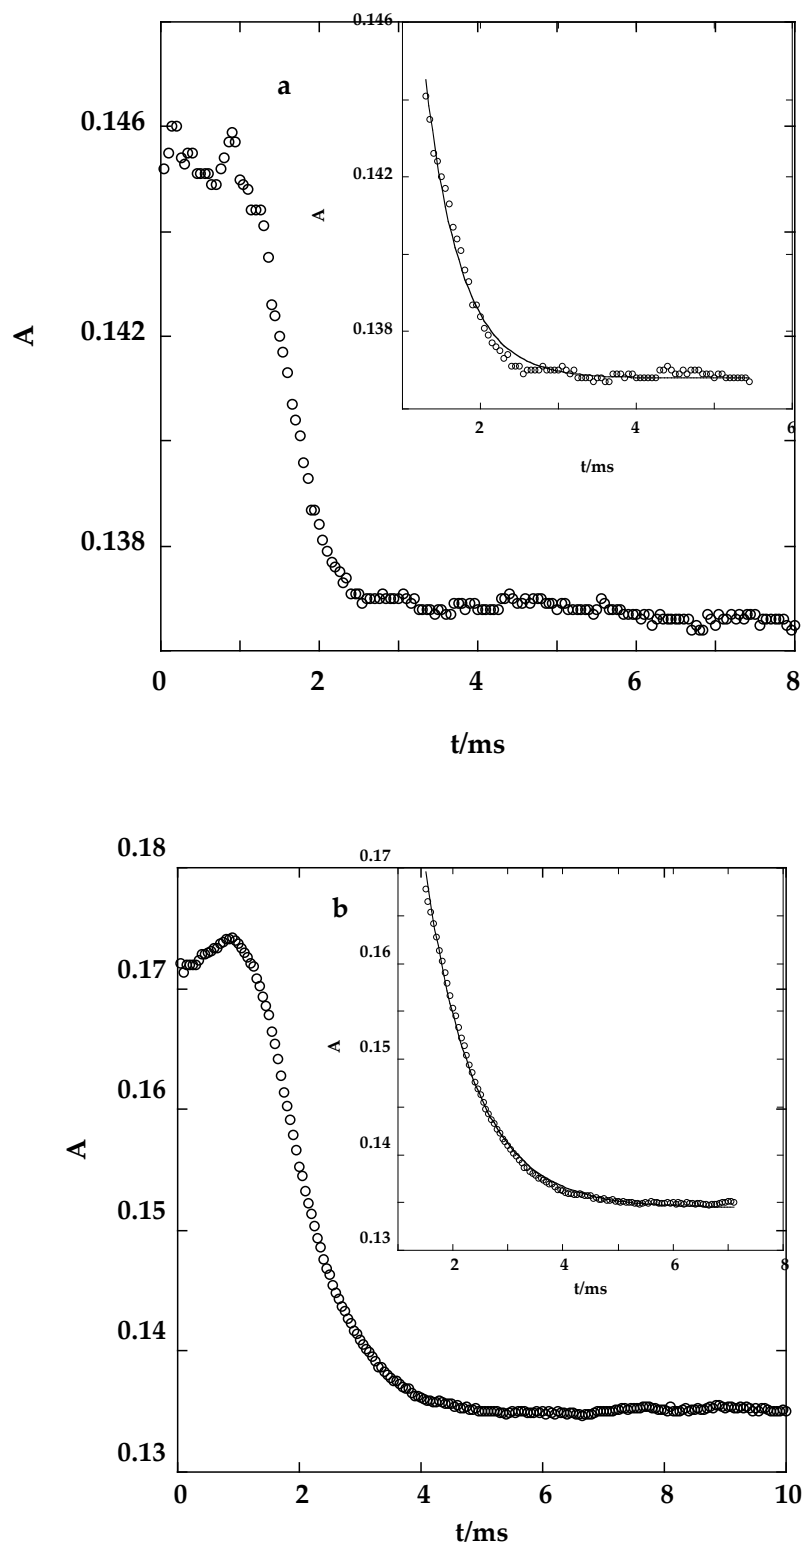

**Figure S2.** Absorbance change at 310 nm in CH<sub>2</sub>Cl<sub>2</sub> at T = 25 °C for the addition of 2,4-TBPP to *trans*-[Rh(Cl)(CO)(SbPh<sub>3</sub>)<sub>2</sub>] to form *trans*-[Rh(Cl)(CO)(SbPh<sub>3</sub>)<sub>2</sub>(2,4-TBPP)] [Rh] = 0.25 mM. (a) [2,4-TBPP] = 25 mM. [SbPh<sub>3</sub>] = 2 mM. (b) [2,4-TBPP] = 2.5 mM. [SbPh<sub>3</sub>] = 10 mM. In the inset the solid line denotes the best fit to a single exponential giving rate constants of 2200±100 s<sup>-1</sup> (a) and 1105±12 s<sup>-1</sup> (b). The first and last part of the data were cut off.

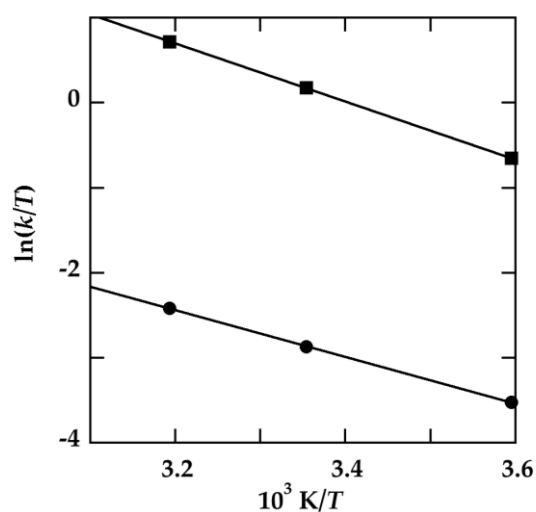

**Figure S3.** Eyring plot for the direct path in the second reaction in Scheme 1 in different solvents. (●) Dichloromethane, (■) Ethyl acetate. Individual rate constants (in  $\text{mol}^{-1} \text{dm}^3 \text{s}^{-1}$ ) at 278.2, 298.2 and 313.2 K are:  $8.22 \pm 0.25$ ,  $17.0 \pm 0.4$ ,  $27.9 \pm 0.4$  (dichloromethane);  $145 \pm 0.8$ ,  $355 \pm 10$ ,  $642 \pm 10$  (ethyl acetate).

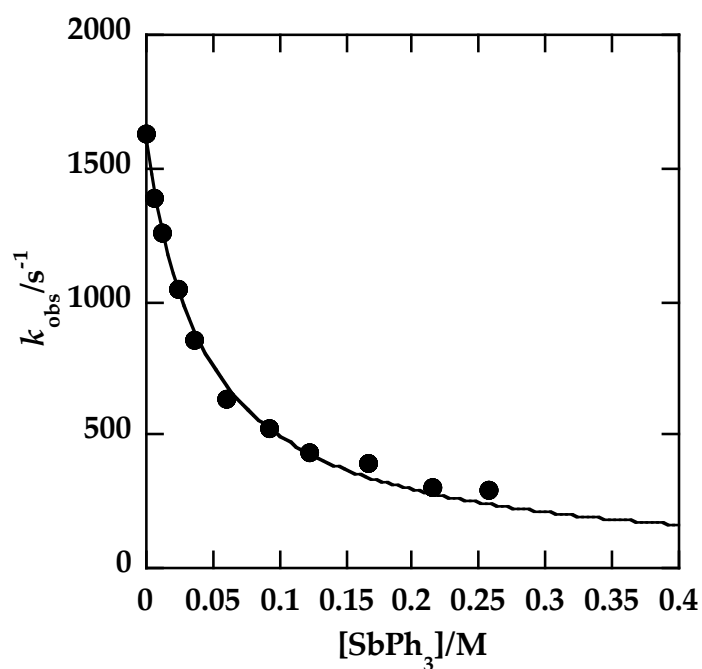

**Figure S4.** A dissociative pathway for the conversion of **1** to **3** (being four-coordinate) gives rise to a rate law of the form  $k_{\text{obs}} = k_1 [2,4\text{-TBPP}] / ((k_{-1}/k_2)[\text{SbPh}_3] + [2,4\text{-TBPP}])$ .

The solid line denotes the best fit to this equation with  $k_1 = 1605 \pm 25 \text{ s}^{-1}$  and  $k_{-1}/k_2 = 0.056 \pm 0.0026$ .

**Table S1.** Observed rate constants at different triphenylstibine concentrations for the reaction of *trans*-[Rh(Cl)(CO)(SbPh<sub>3</sub>)<sub>2</sub>] (**1**) with 2,4-TBPP in CH<sub>2</sub>Cl<sub>2</sub> at 25 °C. [Rh] = 0.25 mM, [2,4-TBPP] = 2.5 mM. Errors are <5%.

| $k_{obs}/s^{-1}$ | [SbPh <sub>3</sub> ]/mM |
|------------------|-------------------------|
| 1630             | 0                       |
| 1390             | 6.13                    |
| 1260             | 12.3                    |
| 1050             | 24.5                    |
| 859              | 36.8                    |
| 634              | 61.3                    |
| 520              | 92.0                    |
| 429              | 123                     |
| 389              | 166                     |
| 303              | 215                     |
| 289              | 258                     |

**Table S2.** Observed rate constants at different triphenylstibine concentrations for the reaction of *trans*-[Rh(Cl)(CO)(SbPh<sub>3</sub>)<sub>2</sub>] (**1**) with 2,4-TBPP in ethyl acetate at -5 °C. [Rh]= 0.25 mM, [2,4-TBPP] = 2.5 mM. Errors are <3%.

| $k_{obs}/s^{-1}$ | [SbPh <sub>3</sub> ]/mM |
|------------------|-------------------------|
| 973              | 3.97                    |
| 780              | 7.94                    |
| 598              | 11.9                    |
| 527              | 15.8                    |
| 439              | 19.8                    |
| 425              | 23.8                    |
| 255              | 39.7                    |
| 139              | 59.5                    |
| 100              | 79.4                    |
| 150              | 99.2                    |
| 116              | 119                     |

**Table S3.** Observed rate constants at different 2,4-TBPP concentrations and temperatures for the reaction of  $[\text{Rh}(\text{Cl})(\text{CO})(\text{SbPh}_3)(2,4\text{-TBPP})]$  (**3**) with 2,4-TBPP to form *trans*- $[\text{Rh}(\text{Cl})(\text{CO})(2,4\text{-TBPP})_2]$  (**4**) in ethyl acetate.  $[\text{Rh}] = 0.25 \text{ mM}$ , no  $\text{SbPh}_3$  added. Errors are <3%.

| [TBPP]/mM | $k_{\text{obs}}/\text{s}^{-1}$ (5 °C) | $k_{\text{obs}}/\text{s}^{-1}$ (25 °C) | $k_{\text{obs}}/\text{s}^{-1}$ (40 °C) |
|-----------|---------------------------------------|----------------------------------------|----------------------------------------|
| 2.50      | 0.3064                                | 0.7282                                 | 1.144                                  |
| 6.30      | 0.8150                                | 1.832                                  | 3.150                                  |
| 12.50     | 1.701                                 | 3.771                                  | 6.873                                  |
| 18.80     | 2.636                                 | 5.860                                  | 11.03                                  |
| 25.00     | 3.547                                 | 8.533                                  | 15.19                                  |
| 37.50     | 5.355                                 | 13.04                                  | 23.46                                  |

**Table S4.** Observed rate constants at different 2,4-TBPP concentrations and temperatures for the reaction of  $[\text{Rh}(\text{Cl})(\text{CO})(\text{SbPh}_3)(2,4\text{-TBPP})]$  (**3**) with 2,4-TBPP to form *trans*- $[\text{Rh}(\text{Cl})(\text{CO})(2,4\text{-TBPP})_2]$  (**4**) in dichloromethane.  $[\text{Rh}] = 0.25 \text{ mM}$ , no  $\text{SbPh}_3$  added. Errors are <3%.

| [TBPP]/mM | $k_{\text{obs}}/\text{s}^{-1}$ (5 °C) | $k_{\text{obs}}/\text{s}^{-1}$ (25 °C) | $k_{\text{obs}}/\text{s}^{-1}$ (40 °C) |
|-----------|---------------------------------------|----------------------------------------|----------------------------------------|
| 2.50      | 0.02554                               | 0.04581                                | 0.07164                                |
| 6.30      | 0.04717                               | 0.07704                                | 0.1665                                 |
| 12.50     | 0.08377                               | 0.1914                                 | 0.3293                                 |
| 18.80     | 0.1407                                | 0.2880                                 | 0.5153                                 |
| 25.00     | 0.1894                                | 0.3848                                 | 0.7135                                 |
| 37.50     | 0.2955                                | 0.6085                                 | 1.018                                  |
| 50.00     | 0.4129                                | 0.8446                                 | 1.400                                  |

### Determination of Equilibrium Constants.

Thermodynamic determination of the equilibrium constants for the 1<sup>st</sup> and 2<sup>nd</sup> step, and the overall equilibrium constant [ $K_{tot}=K_1 \times K_2$ ] (Scheme 2), based on the expressions below were achieved by:

- (i) using the IR Carbonyl  $\nu(\text{C}=\text{O})$  data, [Fig. 2, utilising the absorbance after equilibrium at 24h ( $Ab_{seq}$ )].
- (ii) calculation of the concentrations of different species at equilibrium (denoted by  $[..]_{eq}$ )
- (iii) approximate deconvolution of the spectra in Fig. 2.

This gave the following equilibrium data, from which the respective equilibrium constants were calculated.

**Table S5:** Data Calculated from Figs. 1 and 2 in manuscript

| Complex | $\nu(\text{C}=\text{O})$ | $Ab_{seq}$<br>Fig 2 at 24h | Molar extinction<br>coefficient, $\epsilon$ , from<br>Fig 1 | $[\text{Rh}]_{eq}$<br>(1, 3 or 4) | $[\text{2,4-TBPP}]_{eq}$ | $[\text{SbPh}_3]_{eq}$ |
|---------|--------------------------|----------------------------|-------------------------------------------------------------|-----------------------------------|--------------------------|------------------------|
|         | ( $\text{cm}^{-1}$ )     |                            | ( $\text{M}^{-1}\text{cm}^{-1}$ )                           | (M)                               | (M)                      | (M)                    |
| 1       | 1969                     | <b>0.076</b>               | 64                                                          | <b>0.0012</b>                     | <b>0.00055</b>           | <b>0.0046</b>          |
| 3       | 1994                     | <b>0.115</b>               | 58                                                          | <b>0.0020</b>                     | --                       | --                     |
| 4       | 2009                     | <b>0.095</b>               | 74                                                          | <b>0.0013</b>                     | --                       | --                     |

| Expressions for calculation of<br>Equilibrium constants<br>(Based on Scheme 2) <sup>(a)</sup> | Constant                    | Value <sup>(b)</sup>           |
|-----------------------------------------------------------------------------------------------|-----------------------------|--------------------------------|
| $K_1 = [\text{3}] / ([\text{1}] * [\text{2,4-TBPP}])$                                         | $K_1 (\text{M}^{-1})$       | $(3.0 \pm 0.9) \times 10^3$    |
| $K_2 = ([\text{4}] * [\text{SbPh}_3]^2) / ([\text{3}] * [\text{2,4-TBPP}])$                   | $K_2 (\text{M})$            | $(2.5 \pm 0.7) \times 10^{-2}$ |
| $K_{tot} = ([\text{4}] * [\text{SbPh}_3]^2) / ([\text{1}] * [\text{2,4-TBPP}]^2)$             | $K_{tot} = (K_1 \cdot K_2)$ | $(7.5 \pm 3.2) \times 10$      |

(a) *trans*-[Rh(Cl)(CO)(SbPh<sub>3</sub>)<sub>2</sub>] (1); *trans*-[Rh(Cl)(CO)(SbPh<sub>3</sub>)<sub>2</sub>(2,4-TBPP)] (3); *trans*-[Rh(Cl)(CO)(2,4-TBPP)<sub>2</sub>] (4)

(b) due to uncertainty associated with the deconvolution, esd's of ca. 30% are estimated.
